Interdisciplinary Toxicology  
Revised manuscript #1

**Title: Osmotic fragility during in vitro erythrocyte cytotoxicity induced by aluminium chloride, lead acetate or mercuric chloride in hyposmolar sucrose media**

Running title: Osmotic fragility during in vitro erythrocyte cytotoxicity

Create date: 2021-09-29

| <i>Name</i>                           | <i>Affiliations</i>                                                                           |
|---------------------------------------|-----------------------------------------------------------------------------------------------|
| Dr Nanacha Afifi Igbokwe              | 1. Veterinary Physiology and Biochemistry, University of Maiduguri, Maiduguri, Borno, Nigeria |
| Professor Ikechukwu Onyebuchi Igbokwe | 1. Veterinary Pathology, University of Maiduguri, Maiduguri, Nigeria                          |

Corresponding author: Professor Ikechukwu Onyebuchi Igbokwe <[ikeigbokwe@gmail.com](mailto:ikeigbokwe@gmail.com)>

**Abstract**

Erythrocyte death by eryptosis or erythronecrosis may induce erythrocyte shrinking or swelling with increase in osmotic resistance or fragility as indication of cytotoxicity. We investigated heterogeneous cytotoxic outcomes during in vitro exposure of goat erythrocytes to aluminium chloride, lead acetate or mercuric chloride using erythrocyte osmotic fragility (EOF) testing. The metallic salt solution (MSS) was added to 4.0  $\mu$ L of high (100 mosmol/L) and low (250 mosmol/L) hyposmolar sucrose media at 0.3 or 0.4 mosmol/L concentration during testing of the osmotic fragility of 5.0  $\mu$ L of blood from 10 goats. Haemolysis induced in the media (with and without MSS) was estimated in the supernatant with spectrophotometer at 540 nm. Osmotic stabilization or destabilization was calculated with probability for each test. Inducible osmotic resistance (IOR) was the ratio of mean stabilization to destabilization in both high and low hyposmolar media. Each MSS induced both osmotic resistance (stabilization) and fragility (destabilization) in varied media concentrations, with greater likelihood (P) of stabilization (0.93) or destabilization (0.77) in high or low media hyposmolarity, respectively. The EOF outcomes of the goats diverged within the group. High IOR induced by mercuric chloride (2.90) and low IOR by lead acetate (0.07) and aluminium chloride (0.04) reflected high stabilizing and destabilizing outcomes, respectively. In conclusion, MSS induced dual EOF outcomes (stabilization or destabilization) on the fragility domain, suggesting occurrence of both eryptosis (as stabilization) and erythronecrosis (as destabilization) at low exposure level, whereby biphasic, nonmonotonic or hormetic response to MSS toxic action might exist.

Keywords: erythrocyte death; erythrocyte osmotic fragility; inducible osmotic resistance; metallic salts; xenobiotic cytotoxicity

**Response to reviews:**

response to reviews file - [download](#)

**Supplementary files**

Fig. 1 - [download](#)

1 **Osmotic fragility during *in vitro* erythrocyte cytotoxicity induced by aluminium chloride,**  
2 **lead acetate or mercuric chloride in hyposmolar sucrose media**

3

4

5 Nanacha Afifi Igbokwe<sup>1</sup>, Ikechukwu Onyebuchi Igbokwe<sup>2</sup>

6

7 <sup>1</sup>Department of Veterinary Physiology and Biochemistry

8 <sup>2</sup>Department of Veterinary Pathology

9 Faculty of Veterinary Medicine,

10 University of Maiduguri,

11 P. M. B. 1069,

12 Maiduguri, Nigeria

13

14 \* Corresponding author

15 Ikechukwu Onyebuchi Igbokwe,

16 Strategic Animal Research Group,

17 Faculty of Veterinary Medicine,

18 University of Maiduguri, PO Box 8000, Maiduguri, Nigeria,

19 Phone: +234 834811622, E-mail: ikeigbokwe@gmail.com

20

21

22 Abstract

23 Erythrocyte death by eryptosis or erythronecrosis may induce erythrocyte shrinking or swelling  
24 with increase in osmotic resistance or fragility as indication of cytotoxicity. We investigated  
25 heterogeneous cytotoxic outcomes during in vitro exposure of goat erythrocytes to aluminium  
26 chloride, lead acetate or mercuric chloride using erythrocyte osmotic fragility (EOF) testing. The  
27 metallic salt solution (MSS) was added to 4.0  $\mu\text{L}$  of high (100 mosmol/L) and low (250  
28 mosmol/L) hyposmolar sucrose media at 0.3 or 0.4 mosmol/L concentration during testing of the  
29 osmotic fragility of 5.0  $\mu\text{L}$  of blood from 10 goats. Hemolysis induced in the media (with and  
30 without MSS) was estimated in the supernatant with spectrophotometer at 540 nm. Osmotic  
31 stabilization or destabilization was calculated with probability for each test. Inducible osmotic  
32 resistance (IOR) was the ratio of mean stabilization to destabilization in both high and low  
33 hyposmolar media. Each MSS induced both osmotic resistance (stabilization) and fragility  
34 (destabilization) in varied media concentrations, with greater likelihood (P) of stabilization  
35 (0.93) or destabilization (0.77) in high or low media hyposmolarity, respectively. The EOF  
36 outcomes of the goats diverged within the group. High IOR induced by mercuric chloride (2.90)  
37 and low IOR by lead acetate (0.07) and aluminium chloride (0.04) reflected high stabilizing and  
38 destabilizing outcomes, respectively. In conclusion, MSS induced dual EOF outcomes  
39 (stabilization or destabilization) on the fragility domain, suggesting occurrence of both eryptosis  
40 (as stabilization) and erythronecrosis (as destabilization) at low exposure level, whereby  
41 biphasic, nonmonotonic or hormetic response to MSS toxic action might exist.

42 **Keywords:** erythrocyte death, erythrocyte osmotic fragility, inducible osmotic resistance,  
43 metallic salts, xenobiotic cytotoxicity

44

45 **Introduction**

46 Aluminium (Al), lead (Pb) and mercuric (Hg) compounds are inorganic xenobiotics and metallic  
47 toxicants to humans and animals causing erythrocyte damage or death in the bloodstream  
48 (Pagano and Faggio 2015). Anemia is an important toxic effect arising from their toxicosis  
49 (Flora *et al.*, 2012; Wani *et al.*, 2015; Igbokwe *et al.*, 2019; Vianna *et al.*, 2019). Haemolytic  
50 anemia has been reported in intoxications with aluminium (Aggarwal *et al.*, 1999; Soltaninejad  
51 *et al.*, 2011; Arefi *et al.*, 2013; Malakar *et al.*, 2019), lead (Warang *et al.*, 2017) and mercury  
52 (Ribarov *et al.*, 1983; Maheswaram *et al.*, 2008; Yildirim *et al.*, 2012; Ekawanti *et al.*, 2015;  
53 Weinhouse *et al.*, 2017). The anemia is caused when the metallic ions induce membrane damage  
54 which predisposes the erythrocytes to intravascular hemolysis or removal from the bloodstream  
55 by phagocytes in the reticuloendothelial organs. The basic mechanism of the toxic injury by  
56 metallic ions is oxidative stress due to production of reactive oxygen species and free radicals  
57 promoted by Fenton reaction (Jaishankar *et al.*, 2014). Membrane-bound enzymes which  
58 mediate osmoregulation and osmotic stabilization of erythrocytes are altered by these injurious  
59 processes (Ribarov *et al.*, 1983; Wani *et al.*, 2015; Igbokwe *et al.*, 2019) and plasma membrane  
60 function may be evaluated by erythrocyte osmotic fragility (EOF) technique (Pagano and Faggio,  
61 2015; Farag and Alagawany, 2018).

62

63 Osmoregulation in erythrocytes is maintained by transmembrane ion transporters so that osmotic  
64 stabilization is achieved by ion leaks into and out of erythrocytes, to provide osmotic equilibrium  
65 and avoid osmotic gradient with water flow across the plasma membrane beyond the capacity of

66 regulatory volume adjustments (Armstrong, 2003). Severe toxic injury to erythrocytes interferes  
67 with transmembrane ion transporters and inhibits  $\text{Na}^+\text{-K}^+$  pump causing intracellular influx of  
68 ions with water leading to erythrocyte swelling or oncosis (Vossenkamper and Warnes, 2019)  
69 due to necrotic volume increase (NVI) from defect of membrane semi-permeability (Barros *et*  
70 *al.*, 2001). Erythrocyte oncosis (erythroncosis) with hydration would reduce the capacity of  
71 erythrocytes to withstand hyposmotic stress, thereby increasing EOF (Igbokwe, 2018). In  
72 contrast, mild to moderate toxic injury leads to eryptosis where erythrocytes shrink by losing  
73 ions and water (Bissinger *et al.*, 2019) in eryptotic (apoptotic) volume decrease (EVD) with  
74 dehydration (Bortner and Cidlowski, 2002). The eryptotic erythrocytes transform  
75 morphologically to echinocytes (Chukhlovin, 1996) and have reduced susceptibility to osmotic  
76 fragility (Igbokwe, 2018; Igbokwe *et al.*, 2019), with high resistance to osmotic loading  
77 (Mindukshev *et al.*, 2007). However, spherocytocytes may have decreased deformability with  
78 increase in EOF (Igbokwe, 2018) due to the switch from eryptosis to necrosis and reversion to  
79 NVI (Barros *et al.*, 2001).

80

81 Toxicities involving aluminium and lead ions were reported to increase EOF (Igbokwe,  
82 2018). There was hemolysis of erythrocytes exposed to mercuric ions in isotonic (154 mMol) or  
83 slightly hypotonic (150 mMol) saline (Kerek *et al.*, 2018) and slightly hypotonic (300  
84 mosmol/L) glucose or sucrose (Igbokwe, 2016; Igbokwe *et al.*, 2018), as well as erythrocytes  
85 exposed to lead ions in normal saline (Mrugesh *et al.*, 2011). The increased fragility reflects the  
86 induction of erythroncosis and erythronecrosis (Barros *et al.*, 2001; Vossenkamper and Warnes,  
87 2019). On the other hand, decreased EOF was also reported in toxicities of erythrocytes with  
88 aluminium and mercuric ions (Igbokwe, 2018). Eryptosis has been reported in erythrocytes

89 exposed to aluminium, lead and mercuric ions (Repsold and Joubert, 2018), which could elicit  
90 osmotic resistance by decreasing erythrocyte volume (Bortner and Cidlowski, 2002) and  
91 inhibiting water channels to reduce water flux (Igbokwe *et al.*, 2018, 2019). Therefore, we  
92 hypothesized that the *in vitro* response of goat erythrocytes to cytotoxic injury could cause  
93 decreased or increased EOF because of EVD or NVI, respectively (Barros *et al.*, 2001; Bortner  
94 and Cidlowski, 2002) and subsequently proposed an *in vitro* model of EOF for the assessment of  
95 the effect on plasma membrane stability due to eryptosis or erythroncotic necrosis caused by  
96 metallotoxic compounds (Figure 1). In this study, we carried out an investigation into the  
97 heterogeneous response of goat erythrocytes to osmotic fragility induced during *in vitro* exposure  
98 to aluminium chloride, lead acetate or mercuric chloride at low concentration, in order to gain an  
99 insight, by means of EOF, into the metallotoxic damage associated with inducible osmotic  
100 resistance in addition to elevated osmotic fragility due to erythrocyte death.

101

## 102 **Materials and methods**

### 103 ***In vitro* cytotoxicity model**

104 The experiment used erythrocytes from goat blood to assess the *in vitro* cytotoxicity of metallic  
105 salt solutions (MSS) at low exposure concentrations. Toxic erythrocyte damage by eryptotic or  
106 erythroncotic alterations was determined at low and high hyposmolarity of sucrose media. Goat  
107 erythrocytes were used in this model because the EOF characteristics in sucrose media were  
108 previously described (Igbokwe, 2016; Igbokwe and Igbokwe, 2016) and were presumed to be  
109 hypothetically suitable for the investigation of cytotoxic erythrocyte injury that induced EVD  
110 and NVI (Fig. 1). Empirical assessment of erythrocyte death modality was based on the

111 outcomes of eryptotic stabilization and erythroncotic destabilization of erythrocyte membranes  
112 during EOF (Igbokwe and Igbokwe, 2015; Igbokwe, 2018; Igbokwe *et al.*, 2019).

### 113 **Source of goat blood:**

114 Apparently healthy non-pregnant and non-lactating female Sahel goats, aged about 2.5 years by  
115 dentition and weighing 22-25 kg, were selected for this study from the university animal farm.  
116 They were kept under semi-intensive management in the farm as earlier described (Igbokwe and  
117 Igbokwe, 2015). Blood sample (5ml) was collected from the external jugular vein of each goat in  
118 the morning, anticoagulated in heparinised (heparin, 1.0 mg/mL) plastic tubes (Silver  
119 Diagnostics, Lagos, Nigeria) and transported on ice to the laboratory where it was analysed  
120 within 2 hours. The packed cell volume, erythrocyte count and mean corpuscular volume of each  
121 goat were determined and reported as normal parameters previously (Igbokwe and Igbokwe,  
122 2015).

### 123 **Preparation of reagents:**

124 Isosmotic (isotonic) sucrose (308mosmol/L) stock solution was prepared as described previously  
125 (Igbokwe and Igbokwe, 2016) using sucrose (BDH; Poole, England) with a molar mass of  
126 342.3g/mol. The stock solution was diluted to hyposmotic concentrations of 100 and 250  
127 mosmol/L using the procedure that was previously described (Igbokwe and Igbokwe, 2015,  
128 2016). Aluminium chloride (BDH; Poole, England), lead acetate trihydrate (BDH; Poole,  
129 England) and mercuric chloride (BDH; Poole, England) have molecular weights of 133.34g,  
130 379.33g and 271.52g, respectively. The metallic salts were used to prepare stock salt solutions  
131 with osmotic concentration of 308 mosmol/L (Igbokwe, 2016). Briefly, the procedure for  
132 preparing solutions of a specific concentration involved using the molecular weight or molar

133 mass to prepare a molar solution; and thereafter, the osmotic concentration was derived by  
134 multiplying the molar concentration with the dissociation factor which was the number of ions in  
135 a molecule with presumed complete compound dissociation at high dilution and ambient  
136 temperature. The calculated volumes of aliquots were obtained with the formula of equivalence  
137 ( $C_a \cdot V_a = C_b \cdot V_b$ ) of the products of concentrations (C) and volumes (V) to achieve appropriate  
138 dilutions as earlier reported (Igbokwe and Igbokwe, 2015, 2016).

139

#### 140 **Determination of effect of metallic salt solutions on erythrocyte osmotic fragility:**

141 The sucrose-based erythrocyte osmotic fragility (EOF) technique was previously described  
142 (Igbokwe and Igbokwe, 2015, 2016). This study adopted an abridged EOF with hyposmotic  
143 media at 100 and 250 mosmol/L as high (HH) and low (LH) hyposmolarity, respectively. Each  
144 metallic salt solution (MSS) was tested with blood samples from 10 goats. The EOF for each  
145 blood sample was set up in six test tubes (TT 1-6) with admixtures of hyposmolar media, MSS  
146 and aliquot of blood sample as summarized in Table 1. In the set-up, TT1-2 and TT3-4 tested the  
147 EOF of the blood at 100 and 250 mosmol/L with aluminium chloride (75  $\mu\text{mol/L}$ ), or lead  
148 acetate (100  $\mu\text{mol/L}$ ) solution at an added osmotic concentration of 0.3 mosmol/L or mercuric  
149 chloride solution (133  $\mu\text{mol/L}$ ) at an added concentration of 0.4 mosmol/L in TT2 and TT4. The  
150 TT5 and TT6 contained isosmotic sucrose medium and deionized distilled water, respectively.  
151 The test tube contents were mixed after each test tube received 5  $\mu\text{L}$  of the blood and allowed to  
152 incubate at room temperature (35-38  $^{\circ}\text{C}$ ) for 30 min. The contents of the tubes were centrifuged  
153 at 3000  $\times g$  for 15 min; the supernatant of the hemolysate in each tube was harvested with a  
154 suction pipette into a cuvette, and the colour of hemoglobin was estimated as absorbance units



155 with a spectrophotometer (ALL PRO; Shibe, Qingdao, China) set at 540 nm, using the  
156 supernatants of the tubes containing isosmotic solution (TT5) and deionised distilled water (TT6)  
157 as blank (0%) and complete (100%) hemolysis, respectively (Igbokwe and Igbokwe, 2016). The  
158 estimate of the EOF, as percentage hemolysis, at each haemolytic endpoint was calculated with a  
159 formula (Igbokwe and Igbokwe, 2015):

$$\text{Hemolysis (\%)} = \frac{\text{Absorbance in hyposmolar sucrose medium}}{\text{Absorbance for 100\% lysis in water}} \times 100$$

160

161 **Calculations relating to erythrocyte stabilization and destabilization:**

162 Osmotic stabilization (%) or destabilization (%) of erythrocytes of each goat blood induced by  
163 MSS was calculated as:

$$\text{Osmotic stabilization \% by metallic salt (SI)} = \frac{\text{Hemolysis without metallic salt} - \text{Hemolysis with metallic salt}}{\text{Hemolysis without metallic salt}} \times 100$$

164

165

$$\text{Osmotic destabilization \% by metallic salt (DI)} = \frac{\text{Hemolysis with metallic salt} - \text{Hemolysis without metallic salt}}{\text{Hemolysis with metallic salt}} \times 100$$

166

167 The means of SI or DI at both HH and LH media and the number of animals involved were used  
168 to calculate the pooled mean stabilization (Sm) or destabilization (Dm) by each MSS:

$$S_m (\%) = \frac{N \times SI_{HH} + N \times SI_{LH}}{N_{HH} + (N)LH}$$

169

$$D_m (\%) = \frac{N \times DI_{HH} + N \times DI_{LH}}{(N)HH + (N)LH}$$

170 The inducible osmotic resistance (IOR) index of MSS in HH and LH media was calculated as the  
 171 ratio of  $S_m$  to  $D_m$  ( $S_m/D_m$ ).

172 The probability (P) of occurrence of stabilization (S) or destabilization (D) alone or together  
 173 induced by MSS was calculated as:

$$P(S \text{ or } D) = \frac{\text{Number of animals (S or D)}}{\text{Total number of animals (S and D)}}$$

$$P(S \text{ and } D) = P(S) * P(D)$$

174

## 175 **Statistical analysis**

176 The data were presented as proportions (ratios) or percentages. Summarized data were means  
 177 with standard deviations, and means were compared with Student's t-test or analysis of variance  
 178 with Tukey posthoc test using computer software (GraphPad InStat).

179

## 180 **Results**

### 181 **Effect of aluminium chloride:**

182 The estimates of osmotic hemolysis of erythrocytes in hyposmolar sucrose media containing  
183 aluminium chloride are summarized in Table 2. The mean haemolytic estimate induced by the  
184 MSS was increased ( $p < 0.05$ ) from normal value in LH media, but no variation from normal  
185 value occurred in HH media. The MSS induced stabilization ( $\square 3.5\%$ ) in HH media and  
186 destabilization ( $\square 88.1\%$ ) in LH media with the 10 blood samples. The stabilization was much  
187 lower ( $p < 0.05$ ) than the destabilization in HH and LH media.

#### 188 **Effect of lead acetate:**

189 The hemolytic estimates induced by lead acetate in HH and LH media are presented in Table 3.  
190 The MSS induced both stabilization (5.5%) and destabilization (7.7%) in HH media, but induced  
191 only destabilization (89.8%) in LH media. The hemolytic estimate was higher ( $p < 0.05$ ) than  
192 normal value in LH media, but no variation from normal value occurred in HH media. The  
193 stabilization (5.5%) was lower ( $p < 0.05$ ) than the destabilization (89.8%).

#### 194 **Effect of mercuric chloride:**

195 In Table 4, the exposure of erythrocytes to mercuric chloride in HH media caused a significant ( $p$   
196  $< 0.05$ ) reduction of mean hemolytic estimate from normal value, but no variation from normal  
197 value occurred in LH media. In HH media, there was stabilization (95.1%) with all blood  
198 samples without any occurrence of destabilization. In LH media, both stabilization (12.2%) and  
199 destabilization (21.0%) occurred.

#### 200 **Inducible osmotic resistance (IOR) by the metallic salt solutions (MSS) in hyposmolar** 201 **sucrose media:**

202 The IOR and probability of erythrocyte stabilization or destabilization induced by each MSS are  
203 summarized in Table 5. The Sm was 61.0% with mercuric chloride, and 5.5% and 3.5% when

204 lead acetate and aluminium chloride were tested, respectively. The IOR values were 2.90, 0.07  
205 and 0.04 for the mercuric, lead and aluminium compounds, respectively. The Dm by aluminium  
206 chloride was 88.0%, but it was 76.1% and 21.1% when lead acetate and mercuric chloride were  
207 tested, respectively. The probability of mercuric chloride inducing stabilizing effect in goat  
208 erythrocytes was 0.85, but it was 0.40 and 0.50 for lead acetate and aluminium chloride,  
209 respectively. The probability of a destabilization was high with aluminium chloride (0.50) and  
210 lead acetate (0.60), but it was low with mercuric chloride (0.15). The probability of concurrence  
211 of both effects was 0.13, 0.25 and 0.26 with mercuric chloride, aluminium chloride and lead  
212 acetate, respectively.

213

214 **Comparison of erythrocyte osmotic lysis induced by metallic salt solutions (MSS) in high**  
215 **and low hyposmolar sucrose media:**

216 Erythrocyte stabilization or destabilization induced by MSS in high and low hyposmolar media  
217 are presented in Table 7. Stabilization of erythrocytes induced by MSS was 79.1% higher in HH  
218 than LH media. The stabilizing effect was observed when 28 out 30 goat blood samples were  
219 tested. The probability of stabilization as an outcome of the test was 0.93 in HH media against  
220 0.07 in LH media. Stabilization had 13.3 folds of the chance of occurrence than destabilization in  
221 HH media. Only 2 samples (20%) manifested a stabilization of 7.7% in HH media that was  
222 induced by only lead acetate. Destabilization of erythrocytes, on the other hand, was induced by  
223 MSS with 23 out of 30 goat blood samples and the level was 84.7% higher in LH than HH  
224 media. The destabilization occurred with a higher probability of 0.77 than the probability of 0.23  
225 for stabilization in LH media. Destabilization had 3.3 folds of chance to occur instead of

226 stabilization in LH media. Only mercuric chloride had the capacity to destabilize erythrocytes in  
227 LH media with 70% of blood samples tested.

228

## 229 **Discussion**

230 This study demonstrated the application of abridged sucrose-based EOF in xenobiotic  
231 cytotoxicity testing. The theoretical model (Figure 1) was validated by the observation of  
232 increased or decreased EOF induced by the MSS. Our data demonstrated strong erythrocyte  
233 stabilization and destabilization in HH and LH media, respectively. The phenotypic reasons for  
234 the construct of this EOF model were based on EOF characteristics of goat erythrocytes  
235 (Igbokwe and Igbokwe, 2015, 2016), which was a sigmoidal curve of dependence of hemolytic  
236 estimates on the hyposmolarity of sucrose media (Igbokwe and Igbokwe, 2015), as was similarly  
237 affirmed in a subsequent report (Singh *et al.*, 2019). The sucrose media stabilized goat  
238 erythrocytes from median to maximal hyposmolarity (Igbokwe and Igbokwe, 2015). The  
239 variable non-hemolytic hyposmolar media concentrations of sucrose were 240-300 mosmol/L  
240 (Igbokwe and Igbokwe, 2016). The LH media concentration here was 250 mosmol/L, so that the  
241 counteracting destabilizing effect would be demonstrable during xenobiotic exposure. The  
242 hemolysis in LH media was  $\leq 8.5\%$  for the control and depicted anticipated stabilizing effect, but  
243 this effect was non-existent at hyposmolar concentrations ( $<120$  mosmol/L) causing  $>90\%$   
244 hemolysis (Igbokwe and Igbokwe, 2015, 2016). The hyposmolar concentration of HH media  
245 at  $100$  mosmol/L elicited hemolytic estimates of  $\geq 92.6\%$  for controls showing maximum  
246 erythrocyte destabilization, so that stabilizing effect could be demonstrated during erythrocyte  
247 cytotoxicity.

248

249 For each MSS, the induced change in EOF was both an increase and a decrease depending on the  
250 media hyposmolarity and varied with the erythrocytes of individual goats. The metallic toxicants  
251 are pro-oxidants causing oxidative injury to erythrocytes (Jaishankar *et al.*, 2014). The variability  
252 of hemolytic outcomes would depend on the injurious stimulus derived from the balance of  
253 generated oxidant load and the vigour of antioxidant systems of the erythrocytes. Other factors  
254 affecting the goat-dependent EOF outcomes might include ion contents of erythrocytes, number  
255 and functionality of transmembrane ion transporters, erythrocyte volume and metabolic state,  
256 and membrane surface-to-volume ratio and composition. These physiological factors affect how  
257 the membrane responds to injury and functions as EVD or NVI is induced. The hydration status  
258 of the erythrocytes is influenced by the intracellular ion content (Gallagher, 2017), and decreased  
259 or increased erythrocyte hydration causes decreased or increased EOF, respectively (Cueff *et al.*,  
260 2010). The erythrocytes with membranes that are diffusible to metallotoxic ions are expected to  
261 have enhanced metabolic derangement, followed by drastic energy depletion, and less efficient  
262 antioxidant systems. Sahel goats have wide variability in erythrocyte glutathione contents with  
263 varied capacity for glutathione-based antioxidant defence (Igbokwe *et al.*, 1998). The erythrocyte  
264 death modality, factored as erythrocyte fragility influencer, would be dependent on disposable  
265 energy and the capacity of glutathione regeneration in erythrocytes (Kurata *et al.*, 1994; Orrenius  
266 *et al.*, 2011), and these factors determined whether the injury of the goat erythrocytes responded  
267 with increased or decreased EOF. Therefore, the dual EOF outcomes (stabilization and  
268 destabilization) of goat erythrocytes probably depended on physiological characteristics of  
269 erythrocytes and their ability to cope with physiological risks associated with toxic injury, so that

270 attenuated risks elicited EVD and osmotic stabilization while uncontrolled risks led to NVI and  
271 osmotic destabilization.

272

273 Mercuric chloride induced high osmotic resistance, whereas aluminium chloride and lead acetate  
274 were potent inducers of osmotic fragility based on IOR. The IOR of  $\geq 1.0$  indicated strong  
275 osmotic resistance, while strong hemolytic potential was indicated by a value near zero.  
276 Apparently, each MSS had the capacity to induce both osmotic resistance and fragility under  
277 differentiated hyposmolar environments. The dual EOF outcomes induced by the MSS suggested  
278 that cytotoxic erythrocyte death programme could be detected by this simple EOF technique. The  
279 toxic ions might have interacted with death receptors on surfaces of erythrocyte membranes or  
280 entered the erythrocytes through ion channels by active transport (Bridges and Zalups, 2017),  
281 passive diffusion (Simons, 1986) or both transport modes (Exley and Mold, 2015). Extensive  
282 intracellular traffic of toxic ions was expected to cause severe damage to metabolic processes  
283 that would undermine cellular energy output and antioxidant capacity, and this could predispose  
284 intoxicated erythrocytes to severe homeostatic disruption leading to erythrocyte necrosis  
285 (hemolysis) as observed with toxic actions where EOF increased. Mild cytotoxic injury would  
286 arise when intracellular content of the toxicant was low; with the consequence that metabolic  
287 energy depletion was minimized and antioxidant activity was not overwhelmed, so that residual  
288 cellular energy could be utilized to initiate energy-dependent eryptosis (Orrenius *et al.*, 2011).  
289 Delayed cellular uptake of mercuric ions in media was reported in erythrocytes, because the ions  
290 were bound to membrane proteins without crossing the membrane into the cytoplasm (Zolla *et*  
291 *al.*, 1994). The EOF depended on erythrocyte swelling, membrane stretching and holes  
292 formation, but the primary swelling kinetic would be influenced by mercuric ion-sensitive water

293 channels on membranes (Pribush *et al.*, 2002). The mercuric ions were reported to cross the  
294 erythrocyte membranes later into the cytoplasm to cause hemolysis (Zolla *et al.*, 1994). Thus,  
295 IOR was probably associated with low cytoplasmic distribution of toxic ions with less severe  
296 cytotoxicity causing EVD, along with inhibition of primary swelling by reduced activity of water  
297 channels on erythrocyte membranes (Bortner and Cidlowski, 2002; Pribush *et al.*, 2002; Orrenius  
298 *et al.*, 2011).

299

300 Mercuric chloride induced increased EOF and erythrocyte destabilization in LH media with low  
301 probability and moderate intensity, consistent with reports of mercuric ion-induced hemolysis in  
302 slightly hyposmolar or isosmolar media (Kerek *et al.*, 2018; Igbokwe, 2016; Igbokwe *et al.*,  
303 2018). Aluminium chloride and lead acetate had more destabilizing effects in LH than HH  
304 media. Erythrocyte destabilization was more likely in LH than HH media probably because of  
305 molecular crowding with sucrose that facilitated interaction of toxic ions with the erythrocytes to  
306 enhance the toxic actions (Takahashi *et al.*, 2020). Where destabilization by the MSS occurred in  
307 HH media, it was likely due to subsequent permeabilization of echinocytes after transformation  
308 to spherochinocytes or eryptotic microvesicles (Kerek *et al.*, 2018). The reduction in crowding  
309 of toxic ions with sucrose in HH media would have greatly reduced toxic activity in cytoplasmic  
310 milieu and prevented severe cellular injury with hemolytic outcomes, but erythrocyte  
311 destabilization in HH could be due to postapoptotic necrosis (Orrenius *et al.*, 2011).

312

313 The EOF model produced increasing hemolysis from low to high hyposmolarity in a monophasic  
314 manner considered as monotonic (Singh *et al.*, 2019). As the toxic action increased with



315 molecular crowding, the toxic response was expected to be monotonic, but it seemed to deviate  
316 from monotonicity since EOF outcomes diverged at both ends of hyposmolarity spectrum. This  
317 represented a nonmonotonic response probably influenced by the magnitude of toxic actions in  
318 HH and LH media (Conolly and Lutz, 2004). The use of EOF in cytotoxicity testing had been  
319 recognized (Pagano and Faggio, 2015; Farag and Alagawany, 2018) without positing the  
320 dimensions of the dual opposing outcomes that could be generated from the test as revealed from  
321 this study. The cytotoxicity of toxicants in erythrocytes ought to include eryptosis and necrosis,  
322 with EOF as a preliminary measuring tool for these death modalities, but EOF had not been  
323 hitherto considered as relevant to the assessment of erythrocyte death (Cumming *et al.*, 2012).

324

325 In this study, we identified the exposure level to be close to ‘no observed adverse effect level’  
326 (NOAEL) because no significant differences from control were induced by aluminium chloride  
327 or lead acetate in HH media and mercuric ions in LH media. However, the EOF outcomes from  
328 individual goats exposed to lead and mercuric ions expressed osmotic resistance and fragility as  
329 variants to the adverse effects. The no-observed effect was a nullification of opposing amplitudes  
330 in the toxic action which was made obvious by extension of the exposure level to lower levels  
331 (Igbokwe, 2016) or further reduction of hyposmolarity (Igbokwe *et al.*, 2018). The biphasic or  
332 dual outcome with similar quantitative features across the phases was a subtle pointer to a  
333 hormetic threshold indicated by the EOF model. Hormesis as a biphasic response characterized  
334 by low-dose stimulation and high-dose inhibition extends through NOAEL dose where there is  
335 neutrality (Calabrese and Baldwin, 2002, 2003). The EOF, as toxicological endpoint, can  
336 indicate stimulation of eryptosis through increased IOR, which is a physiological imperative for  
337 osmotic stability; and inhibition connoted decreased IOR with increasing EOF as the usual

338 expectation in adverse effect. Chemical hormesis existed in the toxic actions of aluminium and  
339 mercuric ions (Calabrese and Baldwin, 2003). The adaptive hormetic osmotic resistance prevents  
340 hemolysis as the erythrocytes circulate in the bloodstream, and within physiological limits may  
341 be moderated by antioxidant actions that antagonize toxic effect. Thus, EVD-induced osmotic  
342 resistance may be corrected by regulatory volume increase to restore erythrocyte viability, but  
343 erythrocytes may also be irreversibly dehydrated by solute loss to the extent that regulatory  
344 volume adjustment is no longer feasible, and the erythrocytes become senescent (Gallagher,  
345 2017). Erythrocytes, with induced osmotic resistance, have membrane surface receptors that bind  
346 to phagocytes for their removal from the bloodstream and for engagement in intravascular  
347 coagulation (Qadri *et al.*, 2017). When the osmotic resistance is inhibited, EOF increases with  
348 hemoglobin leak through membrane holes, complete membrane rupture (Pribush *et al.*, 2002) or  
349 engulfment of oncotic erythrocytes with exposed receptors for their capture by phagocytes  
350 (Lecoeur *et al.*, 2001).

## 351 **Conclusion**

352 The *in vitro* cytotoxicity model (using EOF) evaluated the toxic actions of aluminium chloride,  
353 lead acetate and mercuric chloride at low concentrations (around NOAEL) which affected  
354 osmotic membrane stability in varied hyposmolar environments, and it showed that the toxic  
355 actions induced dual outcomes of osmotic resistance (stabilization) and fragility (destabilization)  
356 concurrently, such that the monotonic EOF could be deviated by the toxic effect. The likelihood  
357 of osmotic stabilization or destabilization was increased by high or low media hyposmolarity,  
358 respectively. The erythrocytes of individual goats responded to toxic actions with dual EOF  
359 outcomes where no observed adverse effect was encountered in the group. Thus, EOF could be  
360 an applicable test in toxic conditions causing EVD from eryptosis or NVI from erythronecrosis,

361 and the test model might be used to gauge dual or biphasic, nonmonotonic and hormetic  
362 outcomes in cytotoxicity of erythrocytes.

363

364

### 365 **Acknowledgements**

366 Financial assistance to Nanacha Afifi Igbokwe was granted by the Council of the University of  
367 Maiduguri through a study fellowship for postgraduate training. Technical assistance was  
368 provided by the research laboratory of the Department of Veterinary Pathology, University of  
369 Maiduguri, Maiduguri, Nigeria.

370

371

### 372 **Ethical Compliance**

373 Approval for the research (Ref: PGA/12/07640) was granted by the Board of School of  
374 Postgraduate Studies, University of Maiduguri, Maiduguri, Nigeria, after its ethical committee  
375 affirmed that the research complied with institutional, national and international guidelines on  
376 the use of animals and animal resources for research.

377

378

### 379 **Conflict of Interests**

380 The authors declare no conflict of interest as regards collection and publishing of data from the  
381 research.

382

383

384 References

- 385 Aggarwal P, Handa R, Wig N, Biswas A, Saxena R, Wali JP. Intravascular hemolysis in  
386 aluminium phosphide poisoning. *Am J Emergency Med* 1999; 17: 488-489.
- 387 Arefi M, Parsa V, Yousefinejad V, Darvishi N. Intravascular hemolysis after aluminium  
388 phosphide poisoning. *Indian J Forensic Med Toxicol* 2013; 7: 254-287.
- 389 Armstrong CM. The Na/K pump, Cl ion and osmotic stabilization of cells. *PNAS* 2003; 100:  
390 6257-6262.
- 391 Barros LF, Hermosilla T, Castro J. Necrotic volume increase and the early physiology of  
392 necrosis. *Comp Biochem Physiol A Mol Integr Physiol* 2001; 130: 401-409.
- 393 Bissinger R, Bhuyan AA, Qadri SM, Lang F. Oxidative stress, eryptosis and anemia: a pivotal  
394 mechanistic nexus in systemic diseases. *FEBS J* 2019; 826-854.
- 395 Bortner CD, Cidlowski JA. Apoptotic volume decrease and the incredible shrinking cell. *Cell*  
396 *Death Differ* 2002; 9: 1307-1310.
- 397 Bridges CC, Zalups RK. Mechanism involved in the transport of mercuric ions in target tissues.  
398 *Arch Toxicol* 2017; 91: 63-81.
- 399 Calabrese EJ, Baldwin LA. Defining hormesis. *Hum Exp Toxicol* 2002; 21: 91-97.
- 400 Calabrese EJ, Baldwin LA. Hormesis: the dose-response revolution. *Annu Pharmacol Toxicol*  
401 2003; 43: 175-197.
- 402 Chukhlovin AB. Apoptosis and red blood cell echinocytosis: common features. *Scanning*  
403 *Microsc* 1996; 10: 795-804.
- 404 Conolly RB, Lutz WK. Nonmonotonic dose-response relationships: mechanistic basis, kinetic  
405 modelling and implications for risk assessment. *Toxicol Sci* 2004; 77: 151-157.
- 406 Cueff A, Seear R, Dyrda A, Bouyer G, Egee S, Esposito A, et al. Effect of elevated intracellular  
407 calcium on osmotic fragility of human red blood cells. *Cell Calcium* 2010; 47: 29-36.
- 408 Cumming BS, Wills LP, Schnellmann RG. Measurement of cell death in mammalian cells. *Curr*  
409 *Protoc Pharmacol* 2012; 56: 12.8.1-12.8.24.
- 410 Ekawanti A, Krisnayanti BD. Effect of mercury exposure on renal function and haematological  
411 parameters among artisanal and small-scale gold miners at Sekotong, West Lombok, Indonesia. *J*  
412 *Health Pollut* 2015; 5: 25-32.

- 413 Exley C, Mold MJ. The binding, transport and fate of aluminium in biological cells. *J Trace*  
414 *Elem Med Biol* 2015; 30: 90-95.
- 415 Farag MR, Alagawany M. Erythrocytes as a biological model for screening of xenobiotics  
416 toxicity. *Chem Biol Int* 2018; 278: 73-83.
- 417 Flora G, Gupta D, Tiwari A. Toxicity of lead: A review with recent updates. *Interdiscip Toxicol*  
418 2012; 5: 47-58.
- 419 Gallagher PG. Disorders of erythrocyte hydration. *Blood* 2017; 130: 2699-2708.
- 420 Igbokwe IO, Igwenagu E, Igbokwe NA. Aluminium toxicosis: A review of toxic actions and  
421 effects. *Interdiscip Toxicol* 2019; 12(2):101-126.
- 422 Igbokwe IO, Ribadu AY, Bukar MM. Erythrocyte glutathione concentrations in Nigerian Sahel  
423 goats. *Small Rumin Res* 1998; 30: 1-6.
- 424 Igbokwe NA. Characterization of the osmotic stability of Sahel goat erythrocytes in ionic and  
425 non-ionic hypotonic media (PhD Thesis). Maiduguri, Nigeria: Department of Physiology,  
426 Pharmacology and Biochemistry, Faculty of Veterinary Medicine, University of Maiduguri;  
427 2016; 219 pp
- 428 Igbokwe NA. A review of the factors that influence erythrocyte osmotic fragility. *Sok J Vet Sci*  
429 2018; 16: 1-23.
- 430 Igbokwe NA, Igbokwe IO. Influence of extracellular media's ionic strength on the osmotic  
431 stability of Sahel goat erythrocytes. *J Basic Clin Physiol Pharmacol* 2015; 26(2):171-179.
- 432 Igbokwe NA, Igbokwe IO. Phenotypic homogeneity with minor deviance in osmotic fragility of  
433 Sahel goat erythrocytes in non-ionic sucrose media during various physiologic states. *J Basic*  
434 *Clin Physiol Pharmacol* 2016; 27(6): 633-641.
- 435 Igbokwe NA, Sandabe UK, Bokko BP, Igbokwe IO. Inhibition of osmotic permeability of  
436 caprine erythrocytes by mercuric chloride in osmotic fragility models. *Sok J Vet Sci* 2018; 16:  
437 24-32.
- 438 Jaishankar M, Tseten T, Anbalagan N, Mathew BB, Beeregowda KN. Toxicity, mechanism and  
439 health effects of some heavy metals. *Interdiscip Toxicol* 2014; 7: 60-72.
- 440 Kerek E, Hassanin M, Prenner EJ. Inorganic mercury and cadmium induce rigidity in eukaryotic  
441 lipid extracts while mercury also ruptures red blood cells. *Biochim Biophys Acta* 2018; 1860:  
442 710-717.
- 443 Kurata M, Suzuki M, Haruta K, Takeda K. Relationship between erythrocyte deformability and  
444 glutathione under oxidative stress. *Comp Biochem Physiol Part A Physiol* 1994; 107: 7-12.

445 Lecoœur H, Prevost M, Gougeon M. Oncosis is associated with exposure of phosphatidylserine  
446 residues on the outside layer of the plasma membrane: a consideration of the specificity of the  
447 annexin V/propidium iodide assay. *Cytometry* 2001; 44: 65-72.

448 Maheswaram R, Devapaul A, Muralidharan S, Velmurugan B, Igacimuthu S. Haematological  
449 studies of fresh water fish *Clarias batrachus* (L) exposed to mercuric chloride. *Int Integr Biol*  
450 2008; 2: 49-53.

451 Malakar S, Negi BD, Dutt K, Raina S. Intravascular hemolysis in aluminium phosphide  
452 poisoning. *Indian J Crit Care Med* 2019; 23: 106-107.

453 Mindukshev IV, Krivoslyk VV, Ermolaeva EE, Dobrylko IA, Senchenkov EV, Goncharov NV,  
454 et al. Necrotic and apoptotic volume changes of red blood cells investigated by low-angle light  
455 scattering technique. *Spectroscopy* 2007; 21: 105-120.

456 Mrugesh T, Dipa L, Manishika G. Effect of lead on human erythrocytes: an in vitro study. *Acta*  
457 *Pol Pharm Drug Res* 2011; 68: 653-656.

458 Orrenius S, Nicotera P, Zhivotovsky B. Cell death mechanisms and their implications in  
459 toxicology. *Toxicol Sci* 2011; 119: 3-19.

460 Pagano M, Faggio C. The use of erythrocyte fragility to assess xenobiotic cytotoxicity. *Cell*  
461 *Biochem Funct* 2015; 33: 351-355.

462 Pribush A, Meyerstein D, Meyerstein N. Kinetics of erythrocyte swelling and membrane hole  
463 formation in hypotonic media. *Biochim Biophys Acta* 2002; 1558: 119-132.

464 Qadri SM, Bissinger R, Solh Z, Oldenborg P-A. Eryptosis in health and disease: A paradigm  
465 shift towards understanding the patho-physiological implications of programmed cell death of  
466 erythrocytes. *Blood Rev* 2017; 31: 349-361.

467 Repsold L, Joubert AM. Eryptosis: an erythrocyte's suicidal type of cell death. *Bio Med Res Int*  
468 2018; Article ID 9405816, 10 pages

469 Ribarov SR, Bnov LC, Benchev IC. On the mechanism of mercury-induced hemolysis. *Gen*  
470 *Physiol Biophys* 1983; 2: 81-84.

471 Simons TJB. Passive transport and binding of lead by human red blood cells. *J. Physiol* 1986;  
472 378: 267-286.

473 Singh S, Ponnappan N, Verma A, Mittal A. Osmotic tolerance of avian erythrocytes to complete  
474 hemolysis in solute free water. *Scient Rep* 2019; 9: 7976.

475

476 Soltaninejad K, Nelson LS, Khodakarim N, Dadvar Z, Shadnia S. Unusual complication of  
477 aluminium phosphide poisoning: Development of hemolysis and methemoglobinemia and its  
478 successful treatment. *Indian J Crit Care Med* 2011; 15: 117-119.

479 Takahashi A, Nagao C, Murakami K, Nakabayashi T. Effects of molecular crowding  
480 environment on the acquisition of toxic properties of wild-type SOD1. *Biochim Biophys Acta-*  
481 *Gen Sub* 2020; 1864: 129401

482 Vianna ADS, Matos EP, Jesus IM, Asmu CIRF, Camara VM. Human exposure to mercury and  
483 its haematological effects: a systematic review. *Candad Saude Publica* 2019; 35: e0091618.

484 Vossenkamper A, Warnes G. Flow cytometry reveals the nature of oncotic cells. *Int J Mol Sci*  
485 2019; 20: 4379

486 Wani AL, Ara A, Usmani JA. Lead toxicity: a review. *Interdiscip Toxicol* 2015; 8(2): 55-64.

487 Warang P, Colah R, Kedar P. Lead poisoning induced severe haemolytic anemia, basophilic  
488 stippling, mimicking erythrocyte pyrimidine 5'-nucleotidase deficiency in beta thalassemia  
489 minor. *J Clin Toxicol* 2017; 7: 346

490 Weinhouse C, Ortiz EJ, Berky AJ, Bullins P, Hare-Grogg J, Rogers L, et al. Hair mercury level  
491 is associated with anemia and micronutrient status in children living near artisanal and small-  
492 scale gold mining in Peruvian Amazon. *Am J Trop Med Hyg* 2017; 97: 1886-1897

493 Yildirim R, Erdem F, Gundogdu M, Bilen Y, Koca E, Yillikoglu Y, et al. Mercury toxicity: A  
494 family case report. *Turk J Hematol* 2012; 29: 76-79.

495 Zolla L, Lupidi G, Amiconi G. Effect of mercuric ions on human erythrocytes. 1. Rate of  
496 haemolysis induced by osmotic shock as a function of incubation. *Toxicol In Vitro* 1994; 8: 483-  
497 490.

498

499

500

501

502

503

504

505

506 **Legend to Figure 1**

507

508 **Figure 1:** The theoretical model of how cytotoxic injury causes anemia by eryptosis with  
509 eryptotic volume decrease (EVD) or erythroncotic necrosis with necrotic volume increase (NVI)  
510 [A]; and the erythrocyte osmotic fragility model used in testing erythrocyte cytotoxicity [B]

511

512

513

514

515

516

517

518

519

520

521

522

523

524

525

526

527

528

529

530

531



532 Table 1

533 Experimental testing for the effect of metallic ions on the osmotic stability of erythrocytes of  
534 goats in test tubes containing (+) sucrose media, deionized distilled water, metallic salt solution  
535 and blood

| Test Tube | Sucrose media (mosmol/L) |               |              | Deionized<br>distilled<br>water<br>(5 mL) | *Metallic salt<br>solution<br>(5/7 $\mu$ L) | Blood<br>(5 $\mu$ L) |
|-----------|--------------------------|---------------|--------------|-------------------------------------------|---------------------------------------------|----------------------|
|           | 100<br>(5 mL)            | 250<br>(5 mL) | 308<br>(5mL) |                                           |                                             |                      |
| 1         | +                        | -             | -            | -                                         | -                                           | +                    |
| 2         | +                        | -             | -            | -                                         | +                                           | +                    |
| 3         | -                        | +             | -            | -                                         | -                                           | +                    |
| 4         | -                        | +             | -            | -                                         | +                                           | +                    |
| 5         | -                        | -             | +            | -                                         | -                                           | +                    |
| 6         | -                        | -             | -            | +                                         | -                                           | +                    |

536 \*Metallic salts solutions (308 mosmol/L) was 5  $\mu$ L for aluminium chloride and lead acetate (0.3  
537 mosmol/L, 75 and 100  $\mu$ mol/L) and 7  $\mu$ L for mercuric chloride (0.4 mosmol/L, 133  $\mu$ mol/L).

538

539

540

541

542

543

544

545

546  
547  
548  
549  
550  
551  
552  
553  
554  
555  
556  
557  
558  
559  
560  
561  
562  
563  
564  
565  
566

Table 2: Osmotic lysis of goat erythrocytes in hyposmotic sucrose media containing aluminium chloride

| Concentration of sucrose in media (mosmo/L) | Hemolysis (%) in media with aluminium chloride (mosmol/L) |                       | Osmotic stabilization (%) | Osmotic destabilization (%) |
|---------------------------------------------|-----------------------------------------------------------|-----------------------|---------------------------|-----------------------------|
|                                             | 0.0                                                       | 0.3                   |                           |                             |
| 100                                         | 94.4±3.1 <sup>a</sup>                                     | 91.2±6.5 <sup>a</sup> | 3.5±4.3 (n=10)            | 0.0 (n=0)                   |
| 250                                         | 8.5±0.7 <sup>a</sup>                                      | 71.1±8.2 <sup>b</sup> | 0.0 (n=0)                 | 88.0±0.8 (n=10)             |

<sup>a,b</sup>Means±standard deviations with different superscripts are significantly (p<0.05) different

567  
568  
569  
570  
571  
572  
573  
574  
575  
576  
577  
578  
579  
580  
581  
582  
583  
584  
585  
586

Table 3: Osmotic lysis of goat erythrocytes in hyposmotic sucrose media containing lead acetate

| Concentration of sucrose in media (mosmol/L) | Hemolysis (%) in media with lead acetate (mosmol/L) |                       | Osmotic stabilization (%) | Osmotic destabilization (%) |
|----------------------------------------------|-----------------------------------------------------|-----------------------|---------------------------|-----------------------------|
|                                              | 0                                                   | 0.3                   |                           |                             |
| 100                                          | 92.6±5.8 <sup>a</sup>                               | 89.5±5.9 <sup>a</sup> | 5.5±3.2 (n=8)             | 7.7±0.8 (n=2)               |
| 250                                          | 8.5±0.7 <sup>a</sup>                                | 84.3±8.1 <sup>b</sup> | 0.0 (n=0)                 | 89.8±1.5 (n=10)             |

<sup>a,b</sup>Means±standard deviations with different superscripts are significantly (p<0.05) different

587  
588  
589  
590  
591  
592  
593  
594  
595  
596  
597  
598  
599  
600  
601  
602  
603  
604  
605  
606

Table 4: Osmotic stabilization of Sahel goat erythrocytes in sucrose media containing mercuric chloride

| Concentration of sucrose in media (mosmol/L) | Hemolysis (%) in media with mercuric chloride (mosmol) |                       | Osmotic stabilization (%) | Osmotic destabilization (%) |
|----------------------------------------------|--------------------------------------------------------|-----------------------|---------------------------|-----------------------------|
|                                              | 0.0                                                    | 0.4                   |                           |                             |
| 100                                          | 94.4±2.8 <sup>a</sup>                                  | 5.19±0.9 <sup>b</sup> | 95.1±1.8 (n=10)           | 0.0 (n=0)                   |
| 250                                          | 2.08±0.9 <sup>a</sup>                                  | 1.92±0.6 <sup>a</sup> | 12.2±12.3 (n=7)           | 21.0±9.1 (n=3)              |

<sup>a,b</sup>Means±standard deviations with different superscripts are significantly (p<0.05) different

607  
 608  
 609  
 610  
 611  
 612  
 613  
 614  
 615  
 616  
 617  
 618  
 619  
 620

Table 5: Erythrocyte stabilization or destabilization by aluminium chloride, lead acetate or mercuric chloride

---

| Variable                               | Aluminium chloride | Lead acetate | Mercuric chloride |
|----------------------------------------|--------------------|--------------|-------------------|
| Mean stabilization, Sm, %              | 3.5                | 5.5          | 61.0              |
| Mean destabilization, Dm, %            | 88.0               | 76.1         | 21.1              |
| Inducible Osmotic resistance, IOR      | 0.04               | 0.07         | 2.90              |
| Probability (P) of occurrence (ratio): |                    |              |                   |
| Stabilization, P(S)                    | 0.50               | 0.40         | 0.85              |
| Destabilization, P(D)                  | 0.50               | 0.60         | 0.15              |
| Both S & D, P (S*D)                    | 0.25               | 0.24         | 0.13              |

---

621

622

623

624 Table 6: Comparison of erythrocyte stabilization and destabilization in high and low hyposmolar  
625 sucrose media

| Parameters for all<br>metallic salt<br>solutions | Hyposmolar sucrose media |                   |
|--------------------------------------------------|--------------------------|-------------------|
|                                                  | High, 100 mosmol/L       | Low, 250 mosmol/L |
| Stabilization:                                   |                          |                   |
| Pooled mean (Sp), %                              | 36.8 (3.5-95.1)          | 7.7 (0.0-7.7)     |
|                                                  | [n =28]                  | [n = 2]           |
| Increase in Sp, %                                | 79.1                     | --                |
| Probability (S), ratio                           | 0.93 (28/30)             | 0.07 (2/30)       |
| Increased probability (S), ratio                 | 13.3 (0.93/0.07)         | --                |
| Destabilization:                                 |                          |                   |
| Pooled mean (Dp), %                              | 12.2 (0.0-12.2)          | 80.0 (21.0-88.0)  |
|                                                  | [n =7]                   | [n = 23]          |
| Increase in Dp, %                                | --                       | 84.7              |
| Probability (D), ratio                           | 0.23 (7/30)              | 0.77 (23/30)      |
| Increased probability (D), ratio                 | --                       | 3.3 (0.77/0.23)   |

626

627

628
